# Supplementary material for: Genes WHEAT FRIZZY PANICLE and SHAM RAMIFICATION 2 independently regulate differentiation of floral meristems in wheat
Source: PubMed Central journal article supplement (PMC5751757; doi:10.1186/s12870-017-1191-3), 2017-12-28
Supplement: 12870_2017_1191_MOESM1_ESM.pdf [file 12870_2017_1191_MOESM1_ESM.pdf]

ACAACAAC TACCCGCCCTTCCTCGCGCCGTTCCACGCGCAGCACCAGCCCGCCGCCTACGCCGCGTCCTCGGCCATG  
CCGTACGGCGGCCAGCAGCAGCACGCGGGCGCGGGGCCCGCCGACATTGGCAGCTCGTACCACCACGGCCACGGCTA  
CCACCAGCAGGGCCCGGGGAGTGCTCCATGCCGGTGGCCAGTGCCGCGGATCACGGCGCCAGCGGCCCGATGGACG  
TGC GCGGCAGCAGCGGCCACGACTTCCTCTTCCCAGCGCCGACGACAAC TCCGGGTACCTGAGCAGCGTGGTGCCG  
GAGAGCTGCC TCCGGCCCCGCGGCGGCGACCTGCAGGACGCGCGGCGCTACTCCGTGTCCGACGCCGACGCCTACGG  
GCTGGGCCTCCGGGAGGACGTGGACGACCTGGCGACGATGGTGGCCGGCTTCTGGGGCGGCGCCGACGCGCCGTACG  
GCGGCGGCCACGACATGGTGCCTCGTCGCAGGGCTCGGACAACGGCTACTCCCCCTCAGCTTCCTCTCCCACTGA

aacggacgcgctggcattgctccttagcctcttacgtactcagtggtctgctgtgcccaccgtcggccattagctagc  
tactgtttgcttcgtgagttcgatcgatcgatcatagtagaagatcgtgaagaagagtggctttgttgtttcgggtgc  
cctagcttagcggatgctcacatccatgtacttaggttctttcaattagcagcactattactacgtactactagtag  
tagtaagttttcatgcatgcacgagtgacatgcttaagttatctctctctaaaattattacgcctctctctaatta  
gttagtcgtgtggaattaaagtggcggatcgagagtactcgagaggcccgggaatgtagtacgcacacgcacactgt  
tggtgatccttgaaagcttcagttttgggttgtagttttgtttgattcagataggccggcggaggaacatgtcaa  
gtacgtactctcctacgtacttacctcaaggaagaagataaggggaatagtagacggaccacgtactagacgtagta  
ctaccattgacagttcaacgaaaggtagatggtcaggacaagtgtcaagcaggcgacctccttttttttcttgg  
gtcgcacaggtacttgggtgctgattctagggtagtcacgctcagagcctcagaccatccatcagatgatcagaggg  
ccatgcacaaaatgtatcctcttctatgctggtgcagggttatataaaaccctttcatttccctccgtagcttgct  
tggatttgttgatgggaaatgttcttattaatcaatagcaaaaaaggagaagataaaatgtgcatgtaaccatt  
tgagtttattggacaatcaaaaaaattcagttttgccagatcgctatatagtgcttgacttgtaacaatatttcttat  
gacataaatgagacatgtattaccatgcacaaaaagtatatcacacaaaagaacaagcaattgggttcaagtcctaa  
ccttggcagcggatgctcgac

>*T. sinskajae* PI 418587

acttactcgtatggtcgtgctgagaacatcaccaacatagttggtgaagttattgcggttaatgttttagggaaga  
caaaggggctttcattctagtttgacgtattgcgcgagcaggcacatggacacataagaaagcaaagccataggt  
cagagtgtaaaaagcacataattatgtagcattttggcatgtatcataatagctagtgtagtactagtagtcttgg  
gcatagattgcaattgtctctttcaaaacaaatagattacaattcttcaaaaggcttgatgcataggtaggtaagct  
ctcttctttcccttcttttcttgtcagtgaggcatctttacaccatcttattagtttgcaatacttggtagctag  
tagtaaatcatcaaagcatgcaaggcagtagtcccactaacatagatgccacaacaagctatgcatgtaggccc  
taataattattaaagtggttcttggcaggggttcaatcggctctggttcagaaccagtggtcatatactcat  
atgctggttgattaatttggagtggttagaatcatgacaaagataatcataatctgaaaacgacactaattaact  
tatttgcaaggattgtggcatgcataatattcataaatgaattgtgtgcatgaaaactaagagtagaacattcttac  
ttccaagtgttattttctagcaacacatacacacacananatataatagctatatgtttgactggcacaacattctct  
catctctttggctcctaagattagggcacacaaaatccaacacaaggtgcatacacaacttgcagtgagctttcc  
attccattccctccttttactcctagaattaaacaagtgagcgcagcatgcatgtccctcccctcctcccctacctcgc  
catctcatccacagtgctctcactccttctagcttctccctcctccgagctcccatttaataaccaccctgcctcc  
ctccatagtgagcactacacactagaagctcacagtctcagcaaccacctcctcaacctaagctagctagctcacac  
ctcagagctcaagctagggcgggagcagtagtatagtagccagccaacctcacttacttctgccc

ATGAGCTCTCGCA  
GCAGCAGCGGCGGGCGGGTGCCTCCCAGATGATGGCCTTCTCGGAGCATTGCTGCCGAAGCCGATCGCCGGTCA  
CCGAGCCGAGCCGTCCCCGCGTCTGTCGCCGAGCGAGCGGGCGGGCGCGCGGCAGGCGGGCGCGCAGGAGCC  
CGGGCGCTTCTGGGCGTGCGCCGGCGGCCGTGGGGCCGGTACGCGGCCGAGATACGCGACCCGACCACCAAGGAGC  
GGCACTGGCTCGGCACATTGACACGCGCAGGAGGCCGCCCTGGCCTACGACCGCGCCGCGCTCTCCATGAAGGGC  
GCGCAGGCGCGCACCAACTTCGTCTACGCGCACGCCCTACAACAAC TACCCGCCCTTCTCGCGCCGTTCCACGC

GCAGCACCAGCCC GCCCTACGCCGCGTCC TCGGCCATGCCGTACGGCGGCCAGCAGCAGCACGCGGGCGCGGGC  
CGCCGACATTTGGCAGCTCGTACCACCACGGCCACGGCTACCACCAGCAGGGCCCCGGGCGAGTGCTCCATGCCGGT  
CCCAGTGCCGCGGATCACGGCGCCAGCGGCCGATGGACGTGCGCGGCAGCAGCGGCCACGACTTCCTCTTCCCCAG  
CGCCGACGACA ACTCCGGTACCTGAGCAGCGTGGTGCCGGAGAGCTGCCTCCGGCCCCGCGGCGGCACCTGCAGG  
ACGCGCGGCGCTACTCCGTGTCGACGCCGACGCCTACGGGCTGGGCCTCCGGGAGGACGTGGACGACCTGGCGACG  
ATGGTGGCCGGCTTCTGGGGCGGCGCCGACGCGCCGTACGGCGGCGGCCACGACATGGTCGCTCGTCGCAGGGCTC  
GGACAACGGCTACTCCCCCTCAGCTTCCTCTCCC ACTGAaacggacgcgctggcattgctcttagcctcttacgta  
ctcagtggctctgctgtgcccaccgtcggccattagctaggtactgtttg

>*T. durum* LD222

gcaggcatctttacaccatcttattagtttgcaatacttggtagctcagtagtaaatcatcaaagcatgcaaggcagt  
atgcccaactaacatagatgccacaacaagctatgcatgtaggcccattaataattattaaagtgtttgtcttggca  
ggggcttcaatcggctctggcttcagaaccagtgtgtcatatactcatatgctggttgattaatttgagtgggcta  
gaatcatgacaaagataatcatatctgaaaacgacactaattaatacttatttgaaggattgtggcatgcataata  
ttcataaatgaattgtgtgcatgaaaactaagagtagaacattcttacttccaagtgttatttttctagcaacacat  
acacacacacatatatagctatatgtttgactggcacaacattctcctcatctctttggctcctaagattagggcaca  
caaatccaaacacaaggtgcatacatacaaaacttgcatgagctttccattccattccctccttttactcctagaat  
taacaagtgagcgcagcatgcatgtccctcccctcctcccctacctcgcctatctcatccacagtgtctcactcctc  
tagcttctccctcctccgagctccccatttaaataaccacctgcctccctccatagtgcagcactacacactagaagc  
tcacagtctcagcaaccacctcctcaacctaagctagctagctcacacctcagagctcaagctaggcgggagcagta  
gtatagtagccagccaacctcacttacttctgc ATGAGCTCTCGCAGCAGCAGCGGCGGCGGGTGCCTCCCAG  
ATGATGGCCTTCTCGGAGCATTCGCTGCCGAAGCCGATCGCCGGTACCCCGCAGCCGAGCCGTCCCCGCGTCGTC  
GCCGAGCGAGCGGCCGGCGGCGCGGCAGGCGGCGCGCAGGAGCCCCGGGCGCTTCCTGGGCGTGCGCCGGCGGC  
CGTGGGGCCGGTACGCGGCCGAGATACGCGACCCGACCACCAAGGAGCGGCACTGGCTCGGCACCTTCGACACGGCG  
CAGGAGGCCGCCCTGGCCTACGACCGCGCCGCGCTCTCCATGAAGGGCGCGCAGGCGCGCACCAACTTCGTCTACGC  
GCACGCCGCTACAACA ACTACCCGCCCTTCCTCGCGCGTTCACGCGCAGCACCAGCCCCGCCGCTACGCCGCGT  
CCTCGGCCATGCCGTACGGCGGCCAGCAGCAGCAGCAGCGGGCGCGGGGCCCGCACATTTGGCAGCTCGTACCACCAC  
GGCCACGGCTACCACCAGCAGGGCCCCGGGCGAGTGTTCATGCCGGTGCCTAGTGCCGCGGATCACGGCGCCAGCGG  
CCCCGATGGACGTGCGCGGCAGCAGCGGCCACGACTTCCTCTTCCCCAGCGCCGACGACA ACTCCGGGTACCTGAGCA  
CGGTGGTGCCGGAGAGCTGCCTCCGGCCCCGCGGCGGCGACCTGCAGGACGCGCGGCGCTACTCCGTGTCCGACGCC  
GACGCCCTACGGGCTGGGCCTCCGGGAGGACGTGGACGACCTGGCGACGATGGTGGCCGGCTTCTGGGGCGGCGCCGA  
CGCGCCGTACGGCGGCGGCCACGACATGGTCGCCTCGTCGCAGGGCTCGGACAACGGCTACTCCCCCTCAGCTTCC  
TCTCCC ACTGAaacggacgcgctggcattgctcttagcctcttacgtactcagtggctctgctgtgcccaccgtcggc  
cattagctaggtagtgtttgcttcgtgagttcgatcgatcgatcatagtagaagatcgtgaagaagagtggtttgt  
tgtttcggtgccctagcttagcggatgctcacatccatgtacttaggttctttcaattagcagcactattactcgt  
actactagtagtaagttttcatgcatgcacgagtgcacgtcttaagttatctctctctataaattattacagcct  
ctctctaattagttagctgtgtggaattaaagtggcggatcgagagtactcgagaggccccgggaatgtagtacgcac  
acgcacactgttgtgatccttgaaagcttcagttttgggtgtagttttgattgattcagataggccggccggagg  
aacatgtcaaagtacgtactctcctacgtacttacctcaaggaagaagataagggaatagtacacggaccacgtac  
tagacgtagtactaccattgacagttcaacggaaaggtagatgttcaggacaagtgtaagcaggcgacctccttt  
ttttcttgggtcgccactcgccaggtacttggctgctgattctagggtagtcacgctcagagcctcagaccattc  
atcagatgatcagagggccatgcacaaaatgtatcctctctatgctggtgcagggttatatataaacctttcat  
ttctccgtagcttgcttgatgttggatgttggatgggaaatgctcttattaatcaatagcaaaaaaggagaagatataa

atgtgcatgtaaccatttgagtttattggacaatcaaacaaattcagttttgccagatcgctatatagtgtgact  
tgtacaatattttcttatgacataaatgagacatgtattaccatgcacaaaaagtatatcacacaaaagaacaagcaa  
ttgggttcaagtcctaaccttggcacggatgctcgcactttgctagatTTTTTTAAGGAACATTTTGCTAGATTTAT  
tcaagacattccgacgatatttattcagtaggagagatgttcacatcgacagagaggtgctgttgggttctccgttgcg  
tcagatatggggggttccccctttctcctgctgcctctgtcgtcgttccgggtgggttgcggtgcaggctccgggtgg  
ggtgagccctggtggtgtactttgggtctgggggaaccctggccagtctggccggccccggcgggcgatgcccat  
gggcgcccgc

>*T. turgidum* K-40750

atacttgggtactcagtagtaaatcatcaaagcatgcaaggcagtagtcccaactaacatagatgccacaacaagcta  
tgcattgtagggccattaataattattaaagtgtttgtccttggcaggggttcaatcggctctggcttcagaaccagt  
gtgtcatatactcatatgctggttgattaatttggagtgggctagaatcatgacaaagataatcataatctgaaaacg  
aactaattaatacttatttgaaggattgtggcatgcataatattcataaatgaattgtgtgcatgaaaactaaga  
gtagaacattcttacttccaagtgttatttttctagcaacacatacacacacacatatatagctatatgtttgactg  
gcacaacattctcctcatctctttgtcctaagattagggcacacaaatccaacacaaggtgcatacatacaact  
tgcagtgcagctttccattccattccctcctttactcctagaattaacaaagtgcagcgcagatgcagtcctcctccct  
cctccccctacctcgccatctcatccacagtgtctcactccttctagcttctcctcctccgagctccccatttaa  
taccacctgcctccctccatagtgagcactacacactagaagctcacagtctcagcaaccacctcctcaacctaa  
ctagctagctcacacctcagagctcaagctaggcgaggagcagtagtatagtagccagccaacctcacttcacttctg  
ccATGAGCTCTCGCAGCAGCAGCGGCGGGCGGGTGCCTCCCAGATGATGGCCTTCTCGGAGCATTGCTGCCGAAG  
CCGATCGCCGGTCAACCGCAGCCGAGCCGTCCCCGCCGTGCTCGCCGAGCGAGCGGGCCGGCGGGCGGGCAGGCG  
GCGCGCGCAGGAGCCCGGGCGCTTCCGTTGGCGTGCGCCGGCGGCCGTGGGGCCGGTACGCGGCCGAGATACGCGACC  
CGACCACCAAGGAGCGGCACTGGCTCGGCACCTTCGACACGGCGCAGGAGGCCGCCCGGCCTACGACCGCGCCGCG  
CTCTCCATGAAGGGCGCGCAGGCGCGCACCAACTTCGTCTACGCGCACGCCGCCTACAACAACCTACCCGCCCTTCCT  
CGCGCCGTTCACGCGCAGCACCAGCCCGCCGCTACGCCGCGTCCGCGCCATGCCGTACGGCGGCCAGCAGCAGC  
ACGCGGGCGCGGGGCCCGCCACATTGGCAGCTCGTACCACCACGGCCACGGCTACCACCAGCAGGGCCCGGGCGAG  
TGTTCATGCCGGTGCCAGTGCCGCGGATCACGGCGCCAGCGGCCGATGGACGTGCGCGGCAGCAGCGGCCACGA  
CTTCTCTTCCCCAGCGCCGACGACAACCTCCGGGTACCTGAGCAGCGTGGTGCCGGAGAGCTGCCTCCGGCCCCGCG  
GCGCGACCTGCAGGACGCGCGGGCTACTCCGTGTCCGACGCCGACGCCTACGGGTGGGGCTCCGGGAGGACGTG  
GACGACCTGGCGACGATGGTGGCCGGCTTCTGGGGCGGGCCGACGCGCCGTACGGCGGGCGGCCACGACATGGTCG  
CTCGTCGAGGGCTCGGACAACGGCTACTCCCCCTCAGCTTCCTCTCCCACTGAaacggagcgcgctggcattgctc  
ttagcctcttaoactcagtggtctgtgtgcccaccgtcggccattagc

>*T. durum* R107

tacttactcgtatgttcgtgtcgagaacatcaccaacatagtttgggtgaagttattgcggttaatgttttagggaag  
acaaaaggggctttcattctagtttgacgtattgcgagcagggcacatggacacataagaaagcaaagccatag  
gtcagagtgtaaaaagcacataattatgtagcattttggcatgtatcataatagctagtgtagtactagtatcttg  
gagcatagattgcaattgtctctttcaaacaataagattacaattcttcaaaggcttgatgcataggtaggttag  
ctctcttctttcccttcttttcttgtcagtggtcaggtcctttacaccatcttattagtttgaatacttgggtactc  
agtagtaaatcatcaaagcatgcaaggcagtagtcccaactaacatagatgccacaacaagctatgcatgtagggcc  
attaataattattaaagtgtttgtccttggcaggggttcaatcggctctggcttcagaaccagtgtgtcatatactc  
atatgctggttgattaatttggagtgggctagaatcatgacaaagataatcataatctgaaaacgacactaattaata  
cttatttgaaggattgtggcatgcataatattcataaatgaattgtgtgcatgaaaactaagagtagaacattctt  
acttccaagtgttatttttctagcaacacatacacacacacatatatagctatatgtttgactggcacaacattctc

ctcatctctttggtcctaagattagggcacacaaaatccaaacacaaggtgcatacatatacaaacttgacgtgagcttt  
ccattccattccctccttttactcctagaattaaacaagtgcagcgcacatgcatgtccctcccctcctcccctacctc  
gccatctcatccacagtgtctcactccttctagcttctccctcctccgagctccccatttaataaccaccctgct  
ccctccatagtgcactacacactagaagctcacagtctcagcaaccacctcctcaacctaagctagctagctcac  
acctcagagctcaagctaggcgggagcagtagtatagtagccagccaacctcacttcacttctgcc**ATGAGCTCTCG**  
**CAGCAGCAGCGGGCGGGCGGTGCCCTCCCAGATGATGGCCTTCTCGGAGCATTGCTGCCGAAGCCGATCGCCGGTC**  
**ACCCGCAGCCGCAGCCGTCCCCGCCGTCGTCGCCGAGCGAGCGGGCGGGCGCGCGGCAGGCGGGCGCGCAGGAG**  
**CCCGGGCGCTTCTGGGCGTGGCCGGCGGGCGGTGGGGCCGGTACGGGGCCGAGATACGGGACCCGACCACCAAGGA**  
**GCGGCACTGGCTCGGCACCTTCGACACGGGCGCAGGAGGGCCGCCCGGGCTACGACCGCGCCGCGCTCTCCATGAAGG**  
**GCGCGCAGGCGCGCACCAACTTCGTCTACGCGCACGCCCTACAACAACACCCGCCCTTCTCGCGCCGTTCCAC**  
**GCGCAGCACCAGCCCGCCGCTACGCCGCGTCTCGGCCATGCCGTACGGCGGCCAGCAGCAGCACGCGGGCGCGGG**  
**GCCGCCGACATTGGCAGCTCGTACCACCACGGCCACGGCTACCACCAGCAGGGCCCGGGCGAGTGTTCATGCCG**  
**TGCCCAGTGCCGCGGATCACGGCGCCAGCGGCCCGATGGACGTGCGCGGCAGCAGCGGCCACGACTTCTCTTCCCG**  
**AGCGCCGACGACAACCTCCGGGTACCTGAGCAGCGTGGTGCCTGGAGAGCTGCCCTCCGGCCCCGGCGGGCGGACCTGCA**  
**GGACGGCGGGCGCTACTCCGTGTCCGACGCCGACGCCCTACGGGCTGGGGCTCCGGGAGGACGTGGACGACCTGGCGA**  
**CGATGGTGGCCGGCTTCTGGGGCGGGCGCCGACGCGCCGTACGGCGGGCCACGACATGGTTCGCTCGTCCAGGGC**  
**TCGGACAACGGCTACTCCCCCTCAGCTTCTCTCCACTGA**aacggacgcgctggcattgctcttagcctcttacg  
tactcagtggtctgctgtgcccaccgtcggccattagctaggtagtggttgcttctgtagttcgatcgatcgatcat  
agtagaagatcgtagaagaagagtggctttgtgtttcggtgccctagcttagcggatgctcacatccatgtacttag  
gttctttcaattagcagcactattactacgtactactagtagtaagttttcatgcatgcacgagtgcacatgctt  
aagttatctctctctaaaattattacagcctctctctaattagttagctggtggaattaaagtggcggatcgagag  
tactcgagaggcccgggaatgtagtacgcacacgcacactgttgttgatccttgaagcttcagttttgggtttag  
ttttgtttgattcagatagggccgcccggaggaaatgtcaaagtacgtactctcctacgtacttacctcaaggaaga  
agataagggaatagtacacggaccacgtactagacgttagtactaccattgacagttcaacggaaaggtagatggt  
caggacaagtgtcaagcaggcgacctcctttttttcttgggtcgccactcgccaggctacttgggtgctgattctagg  
gtacgtcacgctcagagcctcagaccattcatcagatgatcagagggccatgcacaaaatgtatcctcttctatgc  
tgggtcagggcttatataataaacctttcatttcctccgtagcttgcttgattgttggatgggaaatggtcttat  
taatcaatagcaaaaaaggagaagatataaatgtgcatgtaaccattgagtttattggacaatcaacaaattca  
gttttgccagatcgctatatagtgcttgacttgtaacaatatttcttatgacataaatgagacatgtattaccatgca  
caaaaagtatatcacacaaaagaacaagcaattgggttcaagtcctaacttggcagggatgctcgcactttgctag  
atTTTTTTAAGGAACATTTTGTAGATTTATTCAAGACATTCGACGATTTTATTTCAGTAGGAGAGATGTTACAT  
cgacagagaggtgcgttggttctccgttgctcagatatggggggttcccccttctcctgctgcctctgtcgtcgtt  
ccggtggtttgcggtgcaggctccggtggtgtagccctggtggtgactttgggtttggggggaaccctggcca  
gtctggccggcccggcggcgatgccatgggcgcttcat
