# Supplementary material for: Genes WHEAT FRIZZY PANICLE and SHAM RAMIFICATION 2 independently regulate differentiation of floral meristems in wheat
Source: PubMed Central journal article supplement (PMC5751757; doi:10.1186/s12870-017-1191-3), 2017-12-28

**Supplemental Figure S1.** Spike with extended spikelet rachilla containing numerous florets (sham ramification). esr - extended spikelet rachilla.

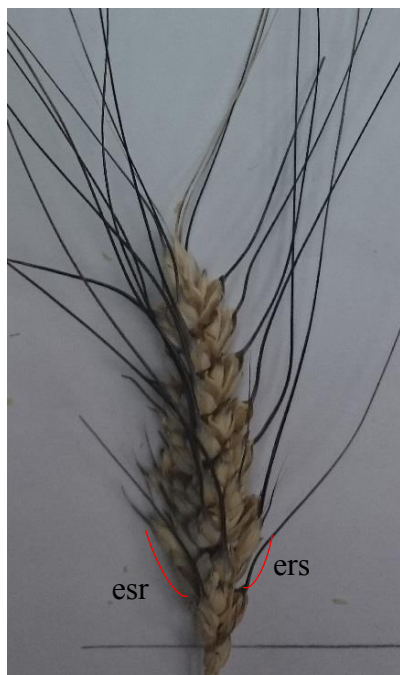

Supplement: 12870_2017_1191_MOESM2_ESM.pdf [file 12870_2017_1191_MOESM2_ESM.pdf]
